# Supplementary figures and images for: Assessment of the impact of direct in vitro PFAS treatment on mouse spermatozoa
Source: PubMed Central journal article supplement — Reprod Fertil. 2024 Mar 8;5(1):e230087. doi: 10.1530/RAF-23-0087 (PMC10959046; doi:10.1530/raf-23-0087), 2024-03-08

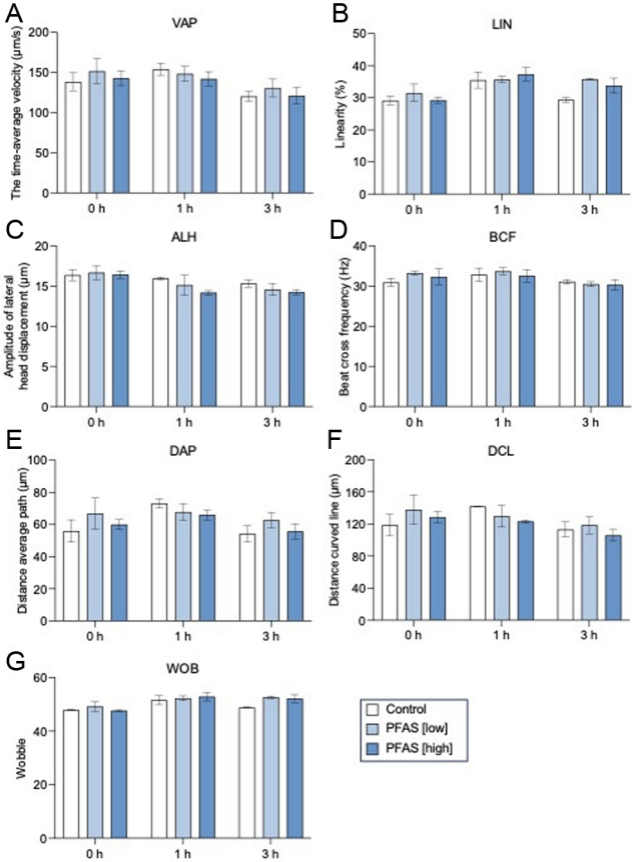

Supplement: supplementary_figure_1.pdf [file supplementary_figure_1.pdf]
